# Supplementary material for: Breathlessness across generations: results from the RHINESSA generation study
Source: PubMed Central journal article supplement (PMC8762033; doi:10.1136/thoraxjnl-2021-217271), 2021-06-14

Supplement

**Breathlessness across generations: results from the RHINESSA generation study****Figure S1.** Directed acyclical graph (DAG) of the effect between parental and offspring breathlessness.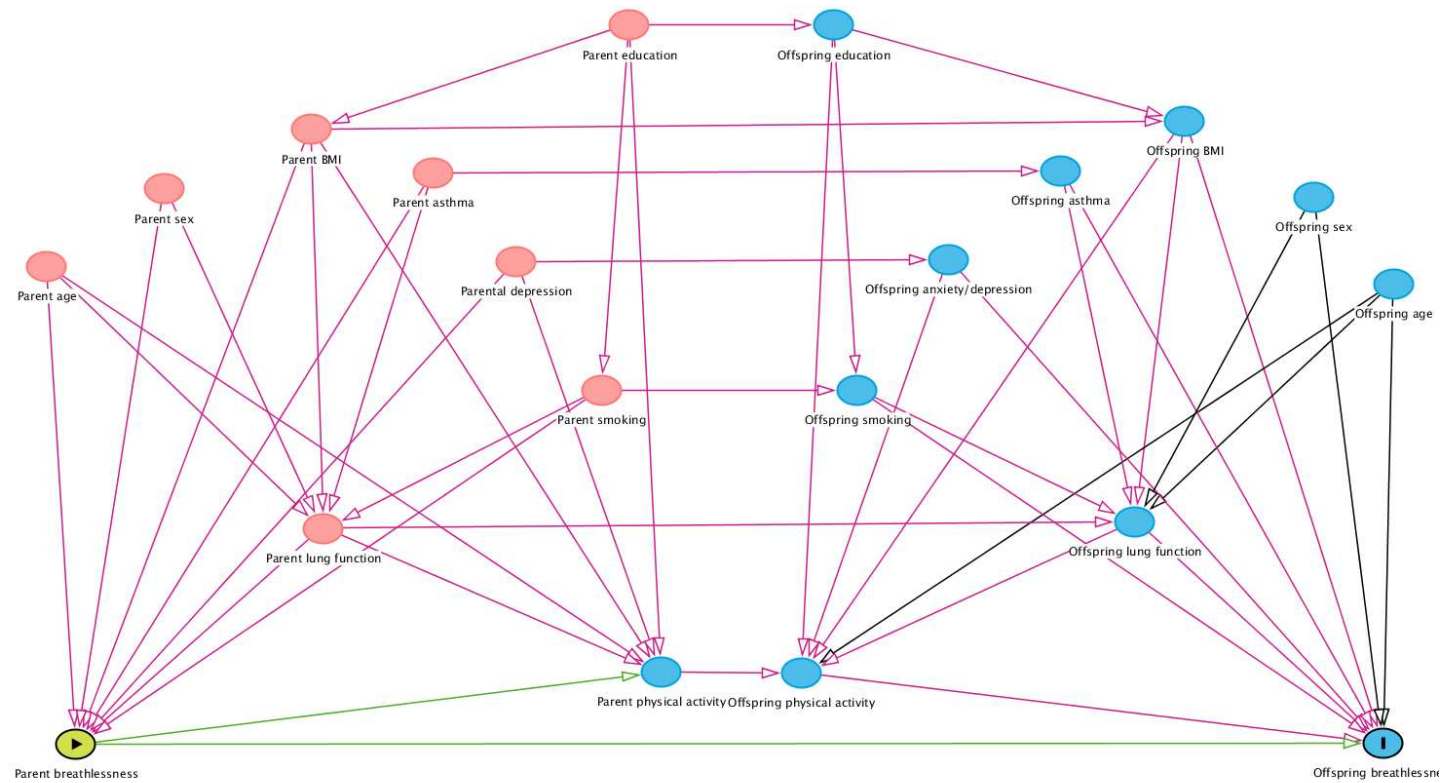

Supplement: thoraxjnl-2021-217271supp001.pdf [file thoraxjnl-2021-217271supp001.pdf]
