# Supplementary material for: Breathlessness across generations: results from the RHINESSA generation study
Source: HighWire-hosted journal article supplement (doi:10.1136/thoraxjnl-2021-217271), 2021-06-14

Supplement

Breathlessness across generations: results from the RHINESSA generation study

Figure S1. Directed acyclical graph (DAG) of the effect between parental and offspring breathlessness.

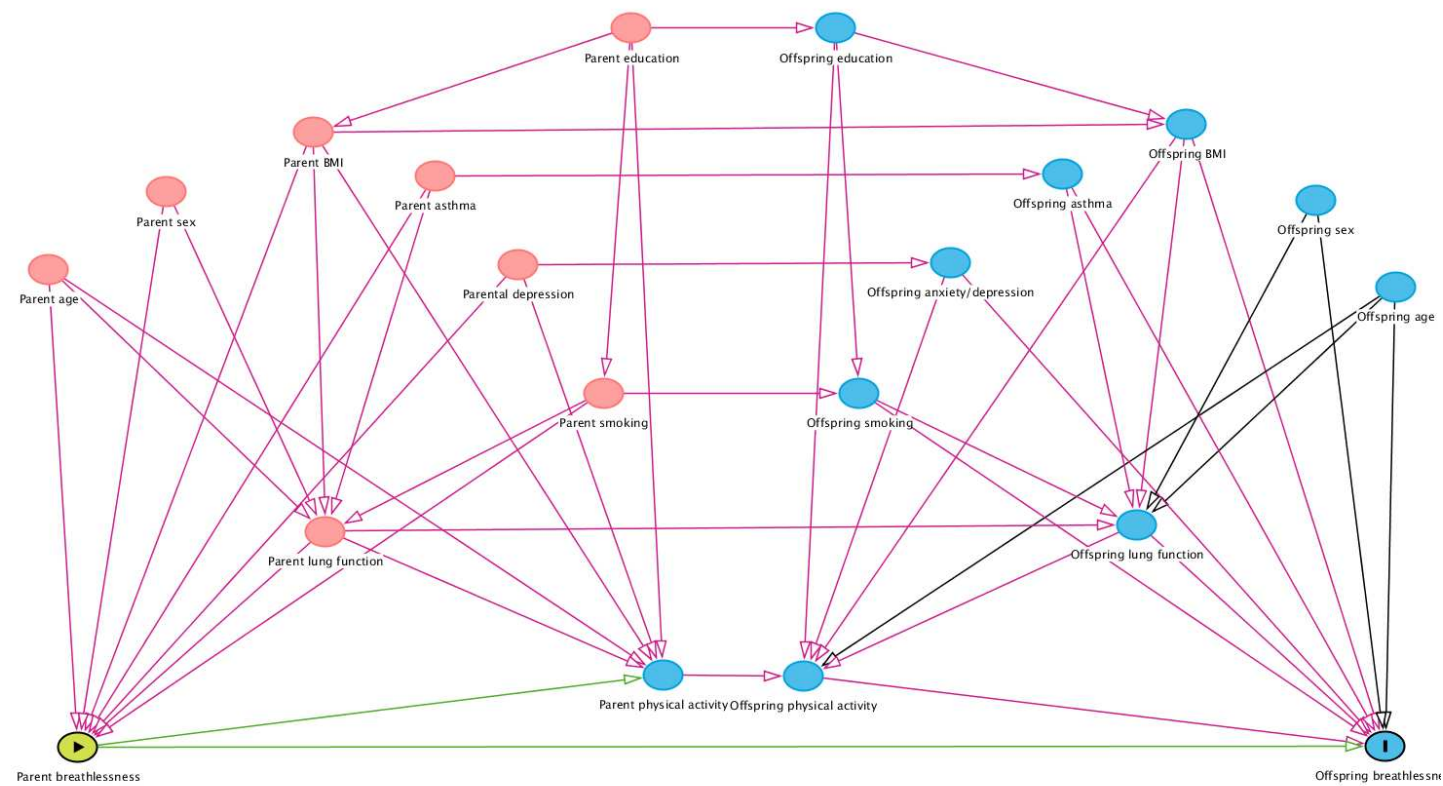

Supplement: thoraxjnl-2021-217271supp001_data_supplement.pdf [file thoraxjnl-2021-217271supp001_data_supplement.pdf]
