# Supplementary material for: Breathlessness across generations: results from the RHINESSA generation study
Source: PubMed Central journal article supplement (PMC8762033; doi:10.1136/thoraxjnl-2021-217271), 2021-06-14
Supplement: thoraxjnl-2021-217271supp002.pdf [file thoraxjnl-2021-217271supp002.pdf]

**Overview of ethics committees and approval numbers of RHINESSA centers**

| <b>Study center/ country</b>                               | <b>Name of ethics committee</b>                                                                                                                                                   | <b>Transcript/ approval number</b>         |
|------------------------------------------------------------|-----------------------------------------------------------------------------------------------------------------------------------------------------------------------------------|--------------------------------------------|
| Sweden (multicenter: Uppsala, Umeå and Göteborg) screening | Regional Ethical Review Board in Uppsala                                                                                                                                          | Dnr 2013/ 352                              |
| Sweden (multicenter: Uppsala, Umeå and Göteborg) clinical  | Regional Ethical Review Board in Uppsala                                                                                                                                          | Dnr 2016/ 023                              |
| Melbourne, Australia                                       | Alfred Hospital Human Research Ethics Committee                                                                                                                                   | HREC/ 17/Alfred/ 144                       |
| Iceland, Reykjavik questionnaire                           | The National Bioethics Committee                                                                                                                                                  | VSN-13-190                                 |
| Iceland, Reykjavik clinical                                | The National Bioethics Committee                                                                                                                                                  | VSN-16-070                                 |
| Denmark                                                    | Ethical Scientific Committee for Mid Region Jylland, Denmark                                                                                                                      | 1-10-72-301-15                             |
| Spain, Huelva                                              | Comité de ética de la investigación de la provincia de Huelva( Research Ethics Committee of the Province of Huelva)                                                               | Approval date April 4, 2013                |
| Spain, Albacete                                            | Comité ético de investigación clínica del Complejo Hospitalario Universitario de Albacete. ( Ethic Committee of clinical Research of the University Hospital Complex of Albacete) | Institutional Review Board<br>IRB 00006998 |
| Estonia, Tartu                                             | Research Ethics Committee of the University of Tartu (UT REC)                                                                                                                     | 233/ T-7                                   |
| Norway, Bergen                                             | Regional Committee of Medical and Health Research Ethics, Rec West                                                                                                                | 2012/1077                                  |
